# Supplementary material for: A Rapid Review of Interventions to Improve Care for People Who Are Medically Underserved with Multiple Sclerosis, Diabetic Retinopathy, and Lung Cancer
Source: MDPI journal article supplement (doi:10.3390/ijerph21050529), 2024-04-24
Supplement: s1 [file s1]

**Table S1.** Search concepts with MESH terms and keywords

| Search Concept         | MESH Terms                                                                        | Keywords                                                                                                                                                                                                                                                                             |
|------------------------|-----------------------------------------------------------------------------------|--------------------------------------------------------------------------------------------------------------------------------------------------------------------------------------------------------------------------------------------------------------------------------------|
| Multiple Sclerosis     | "Multiple Sclerosis"[Mesh]                                                        | Multiple Sclerosis, multiple sclerosis†, Disseminated Sclerosis, MS, acute fulminating multiple sclerosis, relapsing-remitting multiple sclerosis, relapsing remitting multiple sclerosis, chronic progressive multiple sclerosis                                                    |
| Lung Cancer            | "Lung Neoplasms"[Mesh]                                                            | lung neoplasm*, pulmonary neoplasm*, lung cancer*, pulmonary cancer*, cancer of the lung, cancers of the lung, cancer of lung, cancers of the lung                                                                                                                                   |
| Diabetic Eye Disease   | "Macular Edema"[Mesh]<br>"Diabetic Retinopathy"[Mesh]                             | diabetic retinopath*, DR, diabetic macular edema,, DME,, irvine-gass macular edema, Irvine gass macular edema, pseudophakic macular edema,, cystoid macular edema, CME, macular edema,, cystoid macular dystrophy, cominant cystoid macular dystrophy, cystoid central retinal edema |
| Economic Factors       | "Socioeconomic Factors"[Mesh]<br>"Medically Uninsured"[Mesh]                      | socio-economic factor*, low-income population*, low income population*, indigen*, poverty, extreme poverty, absolute poverty, socioeconomic factor*, OR medical indigen*, standard of living, living standard*,                                                                      |
| Uninsured              |                                                                                   | uninsured, medically underinsured, medically under-insured, under-insured, underinsured, un-insured                                                                                                                                                                                  |
| Lack of a medical home | "Patient-Centered Care"[Mesh]                                                     | medical home*, lack medical home, patient-centered care, patient centered care, patient-focused care, patient focused care                                                                                                                                                           |
| Rural Populations      | "Rural Population"[Mesh]<br>"Rural Health Services"[Mesh]<br>"Rural Health"[Mesh] | rural population*, rural spatial distribution*, rural communit*, rural                                                                                                                                                                                                               |

|                          |                                                                                                                                                                                          |                                                                                                                                                                                                                                                                                                                                                                                                                                     |
|--------------------------|------------------------------------------------------------------------------------------------------------------------------------------------------------------------------------------|-------------------------------------------------------------------------------------------------------------------------------------------------------------------------------------------------------------------------------------------------------------------------------------------------------------------------------------------------------------------------------------------------------------------------------------|
|                          | "Hospitals, Rural"[Mesh]                                                                                                                                                                 |                                                                                                                                                                                                                                                                                                                                                                                                                                     |
| People of color          | "Health Disparity, Minority and Vulnerable Populations"[Mesh]<br>"African Americans"[Mesh]<br>"Blacks"[Mesh]<br>"Indigenous Peoples"[Mesh]<br>"American Indians or Alaska Natives"[Mesh] | African-American*, African American*, Afro-American*, Afro American*, People of color, person of color, persons of color, black people, black person*, indigenous people*, native American*, native people*, women of color, bipoc,                                                                                                                                                                                                 |
| Continuum of Care        | "Continuity of Patient Care"[Mesh],                                                                                                                                                      | care continuum, retention in care, care continuity,, patient care continuity, continuity of care, care retention, retention in care, insurance loss, loss of insurance, lack of insurance, coc, Continuum of Care                                                                                                                                                                                                                   |
| Diagnosis                | Diagnosis"[Mesh]<br>"Early Diagnosis"[Mesh]<br>"Early Detection of Cancer"[Mesh]                                                                                                         | early diagnosis, early detection of disease, disease early detection, "Health Surveys"[Mesh], health survey*, "Delayed Diagnosis"[Mesh], delayed diagnos*, late diagnos*, early screening<br>cancer early detection, cancer screening cancer screening test*, early diagnosis of cancer                                                                                                                                             |
| Adherence and Compliance | "Treatment Adherence and Compliance"[Mesh]<br>"Patient Compliance"[Mesh]<br>"Patient Dropouts"[Mesh]                                                                                     | therapeutic adherence and compliance, treatment adherence, therapeutic adherence, , patient compliance, compliance, adherence, patient adherence, treatment compliance, therapeutic compliance, patient non compliance, patient non-compliance, patient noncompliance, non-adherent patient*, non adherent patient*, non-adherence, nonadherence, patient nonadherence, patient non-adherence, noncompliant patient*, non-compliant |

|                     |                                                               |                                                                                                                          |
|---------------------|---------------------------------------------------------------|--------------------------------------------------------------------------------------------------------------------------|
|                     |                                                               | patient*, patient dropout*, retention in care, care retention, noncompliance                                             |
| Disease Progression | "Disease Progression"[Mesh]                                   | disease course, disease progression, disease progressions, progression, disease exacerbation, severity, disease severity |
| Implementation      | "Implementation Science"[Mesh]<br>"Technology Transfer"[Mesh] | Dissemination and implementation                                                                                         |
| Treatment follow-up | "Aftercare"[Mesh]                                             | therapy, treatment, management, follow-up care, follow up care, loss to follow up, lost to follow up                     |

\* used in PubMed to denote truncation and search multiple variants of the word

† misspelling in the terms purposeful to capture possible errors in the articles and database terms

**Table S2. Study Designs, Participants, Care Continuum, Level of Intervention, Interventions, Outcomes, and Findings**

| Author              | Health condition   | Design                                                  | Participants                                                     | Care continuum and level of intervention | Intervention type               | Relevant outcomes                                                                                                                                                                                                                                                                              | Main relevant findings                                                               |
|---------------------|--------------------|---------------------------------------------------------|------------------------------------------------------------------|------------------------------------------|---------------------------------|------------------------------------------------------------------------------------------------------------------------------------------------------------------------------------------------------------------------------------------------------------------------------------------------|--------------------------------------------------------------------------------------|
| Baird, 2020 [21]    | Multiple sclerosis | Quasi-experimental; single group, pre-post intervention | 30 African American participants; 86.7% female, average age 44.3 | Adherence to treatment; patient          | Multicomponent intervention     | Feasibility on four domains: process (recruitment and eligibility rate), resource (adherence, retention, time, cost), management (time, missing data), and scientific outcomes (safety, participant experience and burden, treatment effect). Scientific outcome—change in sedentary behavior. | The intervention was safe and feasible; small positive change in sedentary behavior. |
| Cascione, 2018 [22] | Multiple sclerosis | Randomized controlled trial (RCT); subgroup             | 141 African Americans; average age                               | Adherence to treatment; patient          | Medication administration route | Adherence                                                                                                                                                                                                                                                                                      | At 48 weeks, higher adherence among those taking oral                                |

|                            |                    |                                                                 |                                                                          |                                 |                             |                                                                                                                                                                                                                                     |                                                                                                                                                                                                                           |
|----------------------------|--------------------|-----------------------------------------------------------------|--------------------------------------------------------------------------|---------------------------------|-----------------------------|-------------------------------------------------------------------------------------------------------------------------------------------------------------------------------------------------------------------------------------|---------------------------------------------------------------------------------------------------------------------------------------------------------------------------------------------------------------------------|
|                            |                    | analysis of open-label                                          | 37.7 (fingolimod), 38 (iDMT); female 57% (fingolimod), 55% (iDMT)        |                                 |                             |                                                                                                                                                                                                                                     | versus injectable disease-modifying therapies (DMTs).                                                                                                                                                                     |
| Hartung, 2020 [23]         | Multiple sclerosis | Observational; retrospective cohort                             | 39,661 Medicare beneficiaries; 91.9% White, 74.1% female, average age 66 | Access to treatment; patient    | Insurance subsidy           | DMT initiation                                                                                                                                                                                                                      | Across demographics, newly diagnosed Medicare beneficiaries with reduced cost sharing via a low-income subsidy were more likely to initiate early self-administered DMT than those who did not have a low-income subsidy. |
| Kinnett-Hopkins, 2018 [24] | Multiple sclerosis | Observational; cohort study, single group pre-post intervention | 32 Black participants; 94% female, average age 51.6                      | Adherence to treatment; patient | Multicomponent intervention | Feasibility: process (recruitment and retention), resources (communication and monetary costs), management (data management and safety reporting). Scientific outcomes—safety, burden, adherence, experience, and treatment effect. | The intervention was feasible, effective, and safe; exercise behaviors increased in inactive participants.                                                                                                                |
| Plow, 2019 [25]            | Multiple sclerosis | RCT; single blind, three parallel groups trial                  | 208 participants; 90% White, 84% female, 23% rural, average age 52.1     | Access to specialists; patient  | Telemedicine                | Fatigue impact, physical activity, and health-related quality of life                                                                                                                                                               | Fatigue management improved fatigue and quality of life at 12 weeks compared with social support, but not physical activity. Physical                                                                                     |

|                     |                      |                                  |                                                                                                                                                        |                   |                                                                                    |                                                              |                                                                                                                                                                                                                                                                                                                                                                                    |
|---------------------|----------------------|----------------------------------|--------------------------------------------------------------------------------------------------------------------------------------------------------|-------------------|------------------------------------------------------------------------------------|--------------------------------------------------------------|------------------------------------------------------------------------------------------------------------------------------------------------------------------------------------------------------------------------------------------------------------------------------------------------------------------------------------------------------------------------------------|
|                     |                      |                                  |                                                                                                                                                        |                   |                                                                                    |                                                              | activity had improvement on quality of life compared with social support at 12 weeks.                                                                                                                                                                                                                                                                                              |
| Abramoff, 2018 [26] | Diabetic retinopathy | Observational; superiority study | 900 patients; mean age 59; 47.5% male; 16.1% Hispanic, 28.6% African American                                                                          | Diagnosis; system | Artificial intelligence (AI)-based interpretation of retinal images                | Sensitivity and specificity                                  | The AI system met the prespecified endpoints for superiority compared to the standard approach, with a sensitivity of 87.2% and specificity of 90.7%.                                                                                                                                                                                                                              |
| Alam, 2019 [27]     | Diabetic retinopathy | Observational                    | 115 images from 60 patients with diabetic retinopathy, 90 images from 48 patients with sickle-cell retinopathy, and 40 images from 20 control patients | Diagnosis; system | AI-based interpretation of optical coherence tomography angiography (OCTA) imaging | Sensitivity and specificity                                  | The AI model has 97.84% sensitivity and 96.88% specificity for diagnosing disease versus normal control, 95.01% sensitivity and 92.25% specificity for correctly classifying diabetic versus sickle-cell retinopathy, 92.18% sensitivity and 91.6% specificity for staging diabetic retinopathy, and 93.19% sensitivity and 91.6% specificity for staging sickle-cell retinopathy. |
| Al-Aswad, 2021 [28] | Diabetic retinopathy | Pilot study                      | 957 people; 31% African American,                                                                                                                      | Screening; system | Mobile clinic                                                                      | Patient follow-up rates after diabetic retinopathy screening | 6% of patients screened positive for diabetic retinopathy                                                                                                                                                                                                                                                                                                                          |

|                      |                      |                                                           |                                                                                                                        |                         |                                             |                                                                                                                                     |                                                                                                                                                                                                                                                                   |
|----------------------|----------------------|-----------------------------------------------------------|------------------------------------------------------------------------------------------------------------------------|-------------------------|---------------------------------------------|-------------------------------------------------------------------------------------------------------------------------------------|-------------------------------------------------------------------------------------------------------------------------------------------------------------------------------------------------------------------------------------------------------------------|
|                      |                      |                                                           | 46% Hispanic; 54% female                                                                                               |                         |                                             |                                                                                                                                     | and were referred for follow-up. Of these, 48% were reached for individual follow-up, and 71% of those reached completed ophthalmologist follow-up. Diabetic retinopathy was confirmed in 79% of those reached, and additional eye problems were detected in 43%. |
| Daskivich, 2017 [29] | Diabetic retinopathy | Quasi-experimental; pre- and post-intervention comparison | 600 patients; 63% female; 74% Hispanic or Latino                                                                       | Screening; organization | Teleophthalmology screening in primary care | Screening rates and change in wait time                                                                                             | 16.3% increase in annual screening rates and 89.2% wait-time reduction.                                                                                                                                                                                           |
| Hatef, 2017 [30]     | Diabetic retinopathy | Quasi-experimental; pre- and post-intervention comparison | Total 441 patients: 213 patients in 2010, mean age 51.4, 82.6% female; 228 patients in 2012, mean age 52.3, 82% female | Screening; organization | Teleophthalmology screening in primary care | Efficacy of program, defined as the number of patients with completed annual exams divided by number of patients with diabetes seen | Annual exam completion rate increased from 47.9% to 78.1% ( $p < 0.001$ ; <i>OR</i> 4.98); 12% of those with diabetic retinopathy identified in their scan and were referred to ophthalmologists completed the referral.                                          |
| Jani, 2017 [31]      | Diabetic retinopathy | Quasi-experimental; pre- and post-intervention comparison | 1,787 patients; mean age 55.4; 62.7% female;                                                                           | Screening; organization | Teleophthalmology screening in primary care | Screening rates among eligible patients; factors associated with need                                                               | Pre-implementation screening rate of 25.6%, postimplementation screening rate of                                                                                                                                                                                  |

|                     |                      |                                              |                                                                                                                               |                         |                                             |                                                       |                                                                                                                                                                                                                                                                                                                                                                                                        |
|---------------------|----------------------|----------------------------------------------|-------------------------------------------------------------------------------------------------------------------------------|-------------------------|---------------------------------------------|-------------------------------------------------------|--------------------------------------------------------------------------------------------------------------------------------------------------------------------------------------------------------------------------------------------------------------------------------------------------------------------------------------------------------------------------------------------------------|
|                     |                      |                                              | 55.4% African American; 72.8% publicly insured or uninsured; 64.5% racial/ethnic minorities                                   |                         |                                             | for referral to ophthalmologist                       | 40.4%; 11% of screened patients had diabetic retinopathy without referral; 9.3% had diabetic retinopathy with referral. Of those referred, 60% completed referral visit within study period.                                                                                                                                                                                                           |
| Liu, 2019 [32]      | Diabetic retinopathy | Qualitative; patient and provider interviews | Patients ( $n = 20$ ): median age 67, 55% male, 100% White, non-Hispanic; primary care provider (PCP) ( $n = 9$ ): 77.8% male | Screening; organization | Teleophthalmology screening in primary care | Barriers and facilitators to use of teleophthalmology | Patient barriers included unfamiliarity with teleophthalmology, misconceptions about screening, and logistical difficulties. Facilitators included primary care provider (PCP) recommendation and convenience factors. PCP barriers included not knowing when screening was due and unfamiliarity with teleophthalmology. Facilitators included ease of referral process and communication of results. |
| Mehranbod, 2019[33] | Diabetic retinopathy | Randomized controlled trial (RCT)            | 301 patients; among those randomized to                                                                                       | Screening; organization | Automated telephone appointment reminder    | Appointment attendance rates                          | Among those receiving usual reminders, attendance rates for                                                                                                                                                                                                                                                                                                                                            |

|                        |                      |                                          |                                                                                                                                                                                          |                         |                                             |                                                                             |                                                                                                                                                                                                                                                                                             |
|------------------------|----------------------|------------------------------------------|------------------------------------------------------------------------------------------------------------------------------------------------------------------------------------------|-------------------------|---------------------------------------------|-----------------------------------------------------------------------------|---------------------------------------------------------------------------------------------------------------------------------------------------------------------------------------------------------------------------------------------------------------------------------------------|
|                        |                      |                                          | intervention, mean age 56.9, 32.4% African American, 64.7% Latino, 62.6% female; among those randomized to usual care, mean age 57.2, 27.7% African American, 69.2% Latino, 61.5% female |                         |                                             |                                                                             | appointments were lower among African American patients compared with Latino patients. Adding automated reminders improved attendance and narrowed the disparity in rates between African American and Latino patients; rates for both groups remain low, at 51.6% and 62.3%, respectively. |
| Ramchandran, 2020 [34] | Diabetic retinopathy | Mixed-methods; survey and discussion     | 23 patients; mean age 56, 53% female, 57% African-American, 34% Medicaid                                                                                                                 | Screening; organization | Teleophthalmology screening in primary care | Perceptions and view of teleophthalmology                                   | Patients rated teleophthalmology as highly as regular care, perceived high value of teleophthalmology, and were willing to pay an equivalent copay.                                                                                                                                         |
| Rowe, 2021 [35]        | Diabetic retinopathy | Observational; retrospective descriptive | 875 patients; median age 49, 51.1% female, 31.9% African American, 21.5% Hispanic, 39.2% uninsured,                                                                                      | Screening; system       | Mobile clinic                               | Relative value units and dollar value of service provided at the eye clinic | Relative value units of 1,271.3 for services from October 2013 to February 2020; dollar value equivalent of \$119,263.16, or \$136.30 per screening.                                                                                                                                        |



|                     |                      |                                                                |                                                                |                               |                                             |                                                                                                   |                                                                                                                                                                                                                                                                                                  |
|---------------------|----------------------|----------------------------------------------------------------|----------------------------------------------------------------|-------------------------------|---------------------------------------------|---------------------------------------------------------------------------------------------------|--------------------------------------------------------------------------------------------------------------------------------------------------------------------------------------------------------------------------------------------------------------------------------------------------|
|                     |                      |                                                                | 12% Medicaid                                                   |                               |                                             |                                                                                                   |                                                                                                                                                                                                                                                                                                  |
| Serrano, 2018 [36]  | Diabetic retinopathy | Observational; pre- and post-intervention surveys              | 247 patients; 59% female; 89% over age 50                      | Screening; organization       | Teleophthalmology screening in primary care | Patient satisfaction                                                                              | Patients expressed satisfaction with telemedicine and preferred it to in-person visits; patients who had prior face-to-face exams were less likely to prefer telemedicine.                                                                                                                       |
| Tan, 2021 [37]      | Diabetic retinopathy | Observational; pilot study                                     | 118 patients; average age 45, 74% male, 36% Hispanic or Latino | Diagnosis; system             | Mobile clinic                               | Agreement of optical coherence tomography (OCT) and eye exams for detecting retinal abnormalities | OCT and clinical exam likely complement each other to detect diabetic retinopathy. Among patients with diabetes, OCT and clinical exam had moderate agreement in diagnosing retinopathy, with a third of diagnoses detected by OCT alone, a third by clinical exam alone, and a third with both. |
| Bagcivan, 2018 [38] | Lung cancer          | Qualitative analysis of randomized controlled trial (RCT) data | 142 people; 51% female, 66% rural dwelling, average age 68     | Access to specialists; system | Access to palliative care specialists       | Evaluation and treatment recommendations made in early outpatient palliative care consultations   | Early consultations addressed patient and family concerns not typically addressed in cancer care visits. Commonly evaluated symptoms were mood, general pain, and                                                                                                                                |

|                            |             |                                     |                                                                                                                                                                    |                              |                                                       |                                                               |                                                                                                                                                                                                         |
|----------------------------|-------------|-------------------------------------|--------------------------------------------------------------------------------------------------------------------------------------------------------------------|------------------------------|-------------------------------------------------------|---------------------------------------------------------------|---------------------------------------------------------------------------------------------------------------------------------------------------------------------------------------------------------|
|                            |             |                                     |                                                                                                                                                                    |                              |                                                       |                                                               | cognitive/mental status.                                                                                                                                                                                |
| Beer, 2020 [39]            | Lung cancer | Qualitative; focus groups           | 11 lung cancer survivors: 64% Black or African American, 73% female, average age 64.7; 8 family members: 75% Black or African American, 63% male, average age 58.6 | Access to treatment; patient | mHealth app                                           | Perceived barriers and facilitators of acceptance of the app  | Primary benefits were convenience and having credible health information; top concerns included cost and difficulty of use.                                                                             |
| Cardarelli, 2020 [40]      | Lung cancer | Observational; retrospective cohort | 774 people with lung cancer: 91.2% White, 50% male, average age 63                                                                                                 | Screening; organization      | Screening methods                                     | Subsequent testing and cancer diagnosis                       | Use of Lung-RADS led to 13.3% fewer additional tests compared with NLST. Among those with additional testing, the number identified with cancer was five times higher using Lung-RADS compared to NLST. |
| Cykert, 2019, 2020 [41,42] | Lung cancer | Longitudinal pragmatic trial        | 2019—360 people with breast or lung cancer with the intervention: 31.7% Black, 44.4% female,                                                                       | Access to treatment; system  | Multicomponent quality improvement-based intervention | 2019—treatment completion; 2020—receipt of curative treatment | 2019—Among patients in the intervention group, treatment completion rates did not differ between Black and White patients ( $OR = 0.98$ ;                                                               |

|                   |             |                                       |                                                                                                                                                                                                                                                                                                                                              |                         |                                          |                                                                                        |                                                                                                                                                                                                                                                                                                                                                                                                                                                                                                                           |
|-------------------|-------------|---------------------------------------|----------------------------------------------------------------------------------------------------------------------------------------------------------------------------------------------------------------------------------------------------------------------------------------------------------------------------------------------|-------------------------|------------------------------------------|----------------------------------------------------------------------------------------|---------------------------------------------------------------------------------------------------------------------------------------------------------------------------------------------------------------------------------------------------------------------------------------------------------------------------------------------------------------------------------------------------------------------------------------------------------------------------------------------------------------------------|
|                   |             |                                       | average age 66.2; 2,841 people with breast or lung cancer as historical controls: 15.9% Black, 50.4% female, average age 68.8; 597 people with breast or lung cancer as concurrent controls: 13.2% Black, 46.7% female, average age 69.5. 2020—360 patients in intervention: 32% Black; 2,841 patients in the retrospective group: 16% Black |                         |                                          |                                                                                        | 95% CI: 0.46, 1.2). Among patients in the historical and concurrent control groups, Black patients had reduced treatment completion compared with White patients ( <i>OR</i> = 0.79; 95% CI: 0.65, 0.96; <i>OR</i> = 0.69; 95% CI: 0.49, 0.96).<br><br>2020—Black and White patients in the intervention group had similar receipt of curative treatments. Black patients in the retrospective group had lower rates of receiving curative treatment compared with White patients ( <i>OR</i> = 0.66; 95% CI 0.51, 0.85). |
| Erkmen, 2021 [43] | Lung cancer | Quasi-experimental; feasibility study | 505 people: 56.8% African American, 51% women, median age of 45                                                                                                                                                                                                                                                                              | Screening; organization | Community engaged LDCT screening program | Adherence to follow-up care, cancer diagnosis, cancer treatment, and smoking cessation | At 1 year, all people with Lung-RADS categories 3 or 4, but only 23.7% of those with negative screens, adhered to follow-up screening. At 2 years, only 35.4% with positive                                                                                                                                                                                                                                                                                                                                               |

|                  |             |                                               |                                                  |                                     |                       |                                                                  |                                                                                                                                                                                                                                                                                                                                                             |
|------------------|-------------|-----------------------------------------------|--------------------------------------------------|-------------------------------------|-----------------------|------------------------------------------------------------------|-------------------------------------------------------------------------------------------------------------------------------------------------------------------------------------------------------------------------------------------------------------------------------------------------------------------------------------------------------------|
|                  |             |                                               |                                                  |                                     |                       |                                                                  | screens and no cancer followed up.                                                                                                                                                                                                                                                                                                                          |
| Fung, 2018 [44]  | Lung cancer | RCT                                           | 400 Chinese Americans under age 65               | Screening; patient                  | Patient education     | Changes in knowledge, attitudes, and screening completion/intent | Seminars developed for Cantonese-speaking Chinese Americans had an impact on the beliefs and stated behaviors of Chinese Americans, although at baseline more than two thirds were aware of availability of screening tests. Both groups had high knowledge at baseline. Changes in knowledge, attitudes, and screening intent were minimal between groups. |
| Huang, 2021 [45] | Lung cancer | Observational; case control                   | 956 people: 51% female, 39% Appalachian dwelling | Access to specialists; organization | Molecular tumor board | Survival                                                         | Compared to those with reviews, those without reviews had poorer survival (HR = 8.61; 95% CI: 3.83, 19.31).                                                                                                                                                                                                                                                 |
| Lau, 2021 [46]   | Lung cancer | Quasi-experimental; pre- and post-comparisons | 74 African American patients: 51% male           | Screening; patient                  | Decision aid          | Knowledge, decisional conflict, and acceptability                | Use of the decision aid led to small improvements in knowledge and increased concordance with current recommendations. Knowledge about risk factors and screening improved 25% after viewing                                                                                                                                                                |

|                |             |                                            |                                                  |                    |                    |                                                                                                                                                                                                                                                                        |                                                                                                                                                                                                                                                                                                                                                          |
|----------------|-------------|--------------------------------------------|--------------------------------------------------|--------------------|--------------------|------------------------------------------------------------------------------------------------------------------------------------------------------------------------------------------------------------------------------------------------------------------------|----------------------------------------------------------------------------------------------------------------------------------------------------------------------------------------------------------------------------------------------------------------------------------------------------------------------------------------------------------|
|                |             |                                            |                                                  |                    |                    |                                                                                                                                                                                                                                                                        | the decision aid, decisional conflict decreased by 49%, concordance between individual preference and eligibility for screening increased from 21% to 33%, and 93% of participants said the tool helped them consider screening.                                                                                                                         |
| Li, 2020 [47]  | Lung cancer | Mixed-methods; surveys and focus groups    | 50 Chinese Americans, 84% male, average age 70.4 | Screening; patient | Decision aid       | Knowledge and beliefs associated with lung cancer; perceived benefits of lung cancer screening; barriers and facilitators to lung cancer screening; evaluation of the translated and adapted AHRQ decision aid; elements of a successful lung cancer screening program | Participants reported that the adapted tool would facilitate informed decision making for LDCT screening. Based on reviewing the decision aid, more than 80% understood causes and symptoms of lung cancer and LDCT screening and associated benefits, harms, and insurance coverage, although 66.7% were unable to understand the content without help. |
| Liu, 2020 [48] | Lung cancer | Observational; retrospective data analysis | 101,227 patients aged 20–64 diagnosed with non-  | Diagnosis; system  | Medicaid expansion | Early-stage diagnosis and 2-year survival                                                                                                                                                                                                                              | Compared to men in states that didn't expand Medicaid, those in states that did expand Medicaid had greater increases                                                                                                                                                                                                                                    |

|                       |             |                                     |                                   |                             |                     |                                                                                                                                        |                                                                                                                                                                                                                                                                                                                                                       |
|-----------------------|-------------|-------------------------------------|-----------------------------------|-----------------------------|---------------------|----------------------------------------------------------------------------------------------------------------------------------------|-------------------------------------------------------------------------------------------------------------------------------------------------------------------------------------------------------------------------------------------------------------------------------------------------------------------------------------------------------|
|                       |             |                                     | small-cell lung cancer            |                             |                     |                                                                                                                                        | in 2-year survival and early-stage diagnosis. Outcomes for women did not differ among states that did and did not expand Medicaid.                                                                                                                                                                                                                    |
| Loehrer, 2018 [49]    | Lung cancer | Quasi-experimental                  | 67,987 patients: average age 54.8 | Access to treatment; system | Insurance expansion | Utilization of high-volume hospitals, rates of complex cancer operations, and disparities in use of high-volume hospitals by insurance | Rates of complex surgical care increased by 14% relative to non-expansion states (IRR = 1.14; 95% CI 1.03, 1.27). The probability of undergoing surgical resection at high-volume hospitals did not change.                                                                                                                                           |
| Olazagasti, 2021 [50] | Lung cancer | Observational; retrospective review | 530 patients with lung cancer     | Screening; organization     | Screening methods   | Screening eligibility                                                                                                                  | Among patients already diagnosed with lung cancer, significantly more Hispanic/Latinx patients did not qualify for screening based on USPSTF guidelines compared with patients of other races. Rates of eligibility did not differ between African Americans and those who were White, Asian, or other races comparing the NCCN or USPSTF guidelines. |

|                        |             |                                     |                                                                 |                                 |                         |                                                                                                                                                              |                                                                                                                                                                                                                                                                                          |
|------------------------|-------------|-------------------------------------|-----------------------------------------------------------------|---------------------------------|-------------------------|--------------------------------------------------------------------------------------------------------------------------------------------------------------|------------------------------------------------------------------------------------------------------------------------------------------------------------------------------------------------------------------------------------------------------------------------------------------|
| Otto, 2021 [51]        | Lung cancer | RCT; secondary data analysis        | 137 Black patients and 21 non-Black oncologists                 | Adherence to treatment; patient | Presence of a companion | Communication behavior, time spent with patient, patient confidence in recommended treatment, oncologist perceptions of patient adherence and social support | When a companion was present, oncologists provided more patient-centered communication and spent more time with patients. They perceived patients to be more active participants and to have more social support.                                                                        |
| Owens, 2020 [52]       | Lung cancer | Qualitative study                   | Six lung cancer survivors and six family members                | Access to treatment; patient    | mHealth app             | Cultural sensitivity, quality of life, acceptability                                                                                                         | The majority of participants thought the app was appropriate for African Americans, the information was well understood, and that it would benefit lung cancer survivors to use the app. Participants were receptive to using the app but raised concerns of health literacy for others. |
| Pasquinelli, 2020 [53] | Lung cancer | Observational; retrospective cohort | 883 people: 56.3% African American, 55.8% men, average age 64.8 | Screening; organization         | Screening methods       | Sensitivity                                                                                                                                                  | Among African American patients, the PLCO model had higher sensitivity for lung cancer screening compared with the UPSTSF guidelines ( $p < 0.0001$ ).                                                                                                                                   |
| Percac-Lima, 2018 [54] | Lung cancer | RCT                                 | 1,200 current smokers. 400                                      | Screening; organization         | Patient navigator       | Proportion of patients receiving screening                                                                                                                   | The proportion of patients receiving                                                                                                                                                                                                                                                     |

|                     |             |                              |                                                                                                                                             |                   |                       |                                                   |                                                                                                                                                                                                                                                                                                    |
|---------------------|-------------|------------------------------|---------------------------------------------------------------------------------------------------------------------------------------------|-------------------|-----------------------|---------------------------------------------------|----------------------------------------------------------------------------------------------------------------------------------------------------------------------------------------------------------------------------------------------------------------------------------------------------|
|                     |             |                              | people in intervention: 77.8% White, 47% female, average age 61.8; 800 people in control group: 83.3% White, 55.3% female, average age 62.4 |                   |                       | via computed tomography (CT) scan                 | CT screening via chest or lung CT was higher among those receiving the patient navigator compared with those receiving usual care ( $p < 0.001$ ).                                                                                                                                                 |
| Prosper, 2021 [55]  | Lung cancer | RCT; secondary data analysis | Among the 53,452 National Lung Screening Trial participants, 2,376 Black, 54.7% male, average age of 60.5                                   | Screening; system | Screening methods     | Population-based changes in lung cancer mortality | Compared with the original NLST results, among the synthesized population that mirrored the U.S. population of 13.4% Black individuals, LDCT screening had a greater relative reduction in lung cancer mortality (HR = 0.82; 95% CI 0.72, 0.92 vs. full NLST cohort HR = 0.84; 95% CI 0.76, 0.96). |
| Raghavan, 2020 [56] | Lung cancer | Observational                | 550 people: 20% Black, 66% Medicaid, 34% uninsured, 70% rural                                                                               | Screening; system | Mobile LDCT screening | Lung cancer screening results                     | Screening identified 601 pulmonary nodules, including 267 participants with Lung-RADS 1, 183 participants with Lung-RADS 2, 62 participants with Lung-RADS 3, and 38 participants with                                                                                                             |



|                     |             |                                       |                                                                                       |                         |                          |                                                                                                                              |                                                                                                                                                                                                                                                                                             |
|---------------------|-------------|---------------------------------------|---------------------------------------------------------------------------------------|-------------------------|--------------------------|------------------------------------------------------------------------------------------------------------------------------|---------------------------------------------------------------------------------------------------------------------------------------------------------------------------------------------------------------------------------------------------------------------------------------------|
|                     |             |                                       |                                                                                       |                         |                          |                                                                                                                              | Lung-RADS 4 lesions. Among those screened, 12 had lung cancer. Primary non-small-cell lung cancers were found in 6 people, an additional 5 people had metastatic non-small-cell lung cancers, and 1 person had metastatic small cell undifferentiated lung cancer.                          |
| Randhawa, 2018 [57] | Lung cancer | Quasi-experimental; feasibility study | 169 patients: 65.1% Black, 5.3% Hispanic, 3.6% Asian, 62.1% female, average age 63.99 | Screening; organization | LDCT screening           | Descriptive statistics of screened patients, referrals to screening program, and perceived barriers to lung cancer screening | Screening identified 18.3%, 68.6%, 9.5%, and 3.6% of participants as Lung-RADS 1, 2, 3, and 4, respectively. Among physicians surveyed ( $n = 19$ ; 22% response rate), 15% had never referred a patient. Barriers to referral included time constraints and precertification requirements. |
| Sender, 2019 [58]   | Lung cancer | Quasi-experimental                    | 544 rural patients ages 55–77                                                         | Screening; organization | QI feedback to providers | Screening rates                                                                                                              | After 6 months, screening rates improved to 85%, compared with 68% prior to the intervention.                                                                                                                                                                                               |
| Sferra, 2021 [59]   | Lung cancer | RCT                                   | 237 people: 61.6% African                                                             | Screening; patient      | Decision aid             | Decision regret and knowledge of screening                                                                                   | Patients randomized to Option Grids had lower decision regret                                                                                                                                                                                                                               |

|                       |             |                                     |                                    |                         |                    |                                                                 |                                                                                                                                                                                                                                                                                                                                    |
|-----------------------|-------------|-------------------------------------|------------------------------------|-------------------------|--------------------|-----------------------------------------------------------------|------------------------------------------------------------------------------------------------------------------------------------------------------------------------------------------------------------------------------------------------------------------------------------------------------------------------------------|
|                       |             |                                     | American, 54% male, average age 64 |                         |                    |                                                                 | and higher knowledge regarding next steps for positive screens and potential need for invasive procedures compared with those randomized to ShouldIScreen ( $p = 0.0198$ and $p = 0.02$ ).                                                                                                                                         |
| Springer, 2018 [60]   | Lung cancer | Observational                       | White, ages 55–80                  | Screening; system       | Awareness campaign | Awareness of lung cancer screening                              | Screening rates could not be calculated due to data suppression rules. Evidence did not show differences in screening rates between patients with more than and less than a 30-year smoking history.                                                                                                                               |
| Thurlapati, 2021 [61] | Lung cancer | Observational; retrospective cohort | 980 patients                       | Screening; organization | Screening methods  | Eligibility for screening among patients with known lung cancer | One third of patients diagnosed with lung cancer did not meet the 2103 screening guidelines. Using the revised NCCN guidelines, 12.5% who were ineligible for screening would have been qualified for LDCT and potentially detected cancer at a younger age and lower stage; however, 87.5% of those patients with lung cancer who |

|                             |             |                                       |                                                                           |                         |                      |                                                                                                                     |                                                                                                                                                                                                                           |
|-----------------------------|-------------|---------------------------------------|---------------------------------------------------------------------------|-------------------------|----------------------|---------------------------------------------------------------------------------------------------------------------|---------------------------------------------------------------------------------------------------------------------------------------------------------------------------------------------------------------------------|
|                             |             |                                       |                                                                           |                         |                      |                                                                                                                     | were missed would still not have met screening criteria. Among those who did not meet screening guidelines, 50% were African American, 95% had a smoking history, and 80% were diagnosed with advanced stage lung cancer. |
| Townsend, 2021 [62]         | Lung cancer | Observational; retrospective analysis | 7,807 patients: 99% White, 60% male, average age 63                       | Screening; organization | LDCT screening       | Number of patients screened, screens with follow-up testing, lung cancer detections                                 | In 8 years, 7,807 screens completed, with 1.55% having a diagnostic or therapeutic procedure after LDCT. Lung cancer was detected in 1.4% of screens.                                                                     |
| Williams, Looney, 2021 [63] | Lung cancer | Quasi-experimental; pre-post surveys  | 481 patients; 93% African American, 73.1% female, average age 58.3        | Screening; patient      | Educational sessions | Knowledge of lung cancer screening guidelines                                                                       | Among participants, there was an increase in knowledge, perceived benefits of lung cancer screening, and self-efficacy as well as decreased perceived barriers ( $p = 0.001$ ).                                           |
| Williams, Shelton 2021 [64] | Lung cancer | Quasi-experimental; pre-post surveys  | 77 people: 46% White, 22% Black/African American, 22% Latino, 68% female, | Screening; patient      | Educational sessions | Knowledge of lung cancer screening guidelines and stigmas of cancers, reach, efficacy, adoption, and implementation | Community health workers and partnering with local health systems and communities helped reach more patients and educated them                                                                                            |

|  |  |  |                     |  |  |  |                                                                                                                                 |
|--|--|--|---------------------|--|--|--|---------------------------------------------------------------------------------------------------------------------------------|
|  |  |  | average age<br>44.8 |  |  |  | on cancer<br>screenings.<br>Participants<br>improved on some,<br>but not all,<br>knowledge, benefit,<br>and stigma<br>measures. |
|--|--|--|---------------------|--|--|--|---------------------------------------------------------------------------------------------------------------------------------|

Lung-RADS = Lung Imaging Reporting and Data Systems; NLST = National Lung Screening Trial; RCT = randomized controlled trial; LDCT = low-dose computed tomography; AHRQ = Agency for Healthcare Research and Quality; USPSTF = United States Preventive Services Task Force; NCCN = National Comprehensive Care Network
